1 **Zika virus NS3 protease and its cellular substrates**

2

3 Agnieszka Dabrowska<sup>a,b</sup>, Aleksandra Milewska<sup>a,b</sup>, Joanna Ner-Kluza<sup>c</sup>, Piotr Suder<sup>c</sup>,  
4 Krzysztof Pyrc<sup>a,\*</sup>

5

6 <sup>a</sup> Virogenetics Laboratory of Virology, Malopolska Centre of Biotechnology, Jagiellonian  
7 University, Gronostajowa 7a, 30–387 Krakow, Poland.

8 <sup>b</sup> Microbiology Department, Faculty of Biochemistry, Biophysics and Biotechnology,  
9 Jagiellonian University, Gronostajowa 7, 30-387 Krakow, Poland.

10 <sup>c</sup> Department of Biochemistry and Neurobiology, Faculty of Materials Science and Ceramics,  
11 AGH University of Science and Technology, Mickiewicza 30, 30-059 Krakow, Poland.

12

13 \* Corresponding author

14

15 \* Correspondence should be addressed to **Krzysztof Pyrc**, Virogenetics Laboratory of  
16 Virology, Malopolska Centre of Biotechnology, Jagiellonian University, Gronostajowa 7a,  
17 30-387 Krakow, Poland; Phone number: +48 12 664 61 21; www: <http://virogenetics.info>, E-  
18 mail: [k.a.pyrc@uj.edu.pl](mailto:k.a.pyrc@uj.edu.pl)

19

20 **ABSTRACT**

21 Zika virus is a flavivirus discovered in 1947, but the association between Zika virus  
22 infection and brain disorders was not demonstrated until 2015 in Brazil. Infection mostly poses  
23 a threat to women during pregnancy, since it may cause microcephaly and other neurological  
24 dysfunctions in the developing fetus. However, infection is also associated with Guillain-Barré  
25 syndrome. The nonstructural NS3 protein is essential for virus replication because it helps to  
26 remodel the cellular microenvironment. Several reports show that this protease can process  
27 cellular substrates and thereby modify cellular pathways that are important for the virus. Herein,  
28 we explored some of the targets of NS3, but we could not confirm the biological relevance of  
29 its protease activity. Thus, although mass spectrometry is highly sensitive and useful in many  
30 instances, being also able to show directions, where cell/virus interaction occurs, we believe  
31 that biological validation of the observed results is essential.

## 32 INTRODUCTION

33 Zika virus is a flavivirus discovered in 1947 in primates inhabiting the African Zika forest  
34 (1). Although the virus was found to infect humans, for decades it was not considered to be a  
35 medical threat due to limited distribution and very mild symptoms associated with infection.  
36 However, more than 10 years ago interest in Zika virus began to increase as it became clear that  
37 the virus has broadened its geographic distribution, and the first outbreak was reported in the  
38 Federated States of Micronesia (2). In 2015, case definition became more precise, and some  
39 data suggested that the infection may be more dangerous than previously thought. While the  
40 symptoms are relatively mild and include fever, rash, headache, and muscle pain, infection may  
41 cause severe sequelae, and it is associated with Guillain-Barré syndrome (3). The infection is  
42 most severe in pregnant women, since it interferes with development of the neurological system  
43 of the fetus, predominantly resulting in microcephaly. A number of *in vitro* and *in vivo* studies  
44 have confirmed these observations (4-10).

45 Flaviviruses are small, enveloped viruses with positive-strand RNA genome, which is  
46 delivered to the target cell as a single-stranded RNA molecule containing a single open reading  
47 frame (ORF). This ORF is translated into an immature polyprotein, which is co- and post-  
48 translationally cleaved by viral and cellular proteases to yield 10 mature viral proteins; capsid  
49 (C), membrane (prM/M), and envelope (E) structural proteins; and seven nonstructural proteins  
50 (NS1, NS2A, NS2B, NS3, NS4A, NS4B, and NS5)(11). Cleavage sites processed by the viral  
51 serine NS3 protease are located between NS2A/NS2B, NS2B/NS3, NS3/NS4A, and  
52 NS4B/NS5. Furin or similar cellular proteases process the prM/M site, while other host cell  
53 proteases reportedly cleave C/prM, prM/E, E/NS1, NS1/NS2A, and NS4A/NS4B sites(12). The  
54 NS3 protein consists of an N-terminal serine protease domain (~180 amino acids) and a  
55 C-terminal region harboring RNA helicase, nucleoside triphosphatase, and 5' RNA  
56 triphosphatase activities. The active site of the N-terminal protease contains a His-Asp-Ser

57 catalytic triad. Furthermore, the small nonstructural NS2B protein serves as an NS3 protease  
58 cofactor and anchors it to the endoplasmic reticulum (ER) membrane (13-17). The presence or  
59 absence of NS2B affects the tertiary structure, activity, and stability of NS3 (18-20).

60 Flaviviral proteases are essential for viral replication, hence they are considered promising  
61 targets for antiviral agents. Indeed, the development of HCV NS3/NS4A protease inhibitors  
62 proved a breakthrough in hepatitis C therapy, and these drugs received U.S. Food & Drug  
63 Administration (FDA) and European Medicines Agency (EMA) approval for use in humans  
64 (21-23).

65 Interestingly, flaviviral proteases have also been reported to modify the cellular  
66 microenvironment. Cleavage of host proteins may be beneficial for the virus by diminishing  
67 the cellular responses, remodeling cellular metabolism, and other mechanisms. Such a strategy  
68 is common for viruses, as exemplified by human rhinovirus (HRV) that modulates apoptosis  
69 by cleaving receptor-interacting protein kinase-1 (RIPK1) at the noncanonical site, and  
70 blocking caspase 8-mediated activation of the pathway (24). Interestingly, the picornaviral  
71 protease also processes translation initiation factor eIF4G, part of the cellular translation  
72 initiation complex. Targeting of this molecule results in decreased production of cellular  
73 proteins but does not affect the production of viral proteins, as picornaviruses use internal  
74 ribosome entry sites (IRES) for cap-independent translation. In this way, the viral protease  
75 hijacks the cellular protein production machinery (25-27). The NS3/NS4A protease of hepatitis  
76 C virus cleaves mitochondrial antiviral signaling protein (MAVS) and TIR domain-containing  
77 adapter-inducing interferon- $\beta$  protein (TRIF) to evade the host cell antiviral response (28-30).

78 Various targets of the Zika virus protease have been identified. FAM134B (family with  
79 sequence similarity 134), ATG16L1 (autophagy-related protein 16-1), eIF4G1 (eukaryotic  
80 translation initiation factor 4 gamma 1), and Septin-2 are among the most interesting targets.  
81 Except for FAM134B, these targets were identified using mass spectrometry methods, which

82 provide unrivalled sensitivity and are capable of cell proteome studies. However, careful  
83 analysis of the reported data showed that none of the protein targets are shared between the  
84 published studies. Thus, we explored the reported data in detail by employing classical  
85 approaches such as western blotting, as well as functional approaches based on the activity of  
86 particular pathways. Herein, we present an example of such a study, in which we failed to  
87 confirm protease-mediated or virus-related degradation of the eIF4G1 protein. We were also  
88 unable to confirm the beneficial effects of decreasing eIF4G1 on viral replication.

## 89 **MATERIALS AND METHODS**

### 90 **Cell culture**

91 293T cells (ATCC CRL-3216; human embryonic kidney cells), A549 cells (ATCC CCL-  
92 185; lung carcinoma cells), Vero cells (ATCC CCL-81; African green monkey kidney cells),  
93 and U251 cells (human glioblastoma cell line) were maintained in Dulbecco's modified Eagle's  
94 medium (DMEM; Corning, Poland) supplemented with 3% fetal bovine serum (FBS; heat-  
95 inactivated; Thermo Scientific, Poland), 100 µg/ml streptomycin, 100 U/ml penicillin (Sigma-  
96 Aldrich, Poland), and 5 µg/ml ciprofloxacin. Cells were maintained at 37°C under 5% CO<sub>2</sub>.

97

### 98 **Virus strains, preparation, and titration**

99 ZIKV H/PF/2013 (acquired from European Virus Archive), ZIKV H/PAN/2016 (BEI  
100 resources), ZIKV R116265 Human 2016 Mexico (BEI resources), ZIKV Mosquito Mex 2-81  
101 (BEI resources), ZIKV PRVABC59 (BEI resources), ZIKV MR766 (BEI resources), ZIKV IB  
102 H 30656 (BEI resources), ZIKV FLR (BEI resources), ZIKV R103451 Human 2015 Honduras  
103 (BEI resources), ZIKV P 6-740 Malaysia 1966 (BEI resources), and ZIKV DAKAR 41524  
104 (BEI resources) strains were employed in this work.

105 Virus stocks were generated by infection of Vero cells. At 3 days post-infection (p.i.) at  
106 37°C, virus-containing medium was collected and titrated. As a control, mock-infected Vero  
107 cells were subjected to the same procedure. Virus and mock aliquots were stored at -80°C. Virus  
108 titration was performed on confluent Vero cells in a 96-well plate according to the method  
109 described by Reed-Muench(31). Briefly, cells infected with serially diluted virus were  
110 incubated at 37°C for 3 days, and the occurrence of a cytopathic effect (CPE) was monitored.

111

## 112 **Plasmids**

113 The region encoding the NS2B-NS3<sup>WT</sup> protein was amplified by PCR using a cDNA  
114 template generated from H/FP/2013 Zika virus and appropriate primers (5' ATG CGG TAC  
115 CGC CAC CAT GGG CAG CTG GCC CCC TAG CGA A 3'; 5' AGC CGG TAC CCT ATC  
116 TTT TCC CAG CGG CAA ACT CC 3'). The resulting product was digested with *NotI*-HF and  
117 *KpnI*-HF (New England Biolabs), gel-purified, and cloned into the pBudCE4.1 vector  
118 (pBudCE4.1\_NS3<sup>WT</sup>). The plasmid encoding the inactive NS2B-NS3<sup>S135A</sup> protease  
119 (pBudCE4.1-NS3<sup>S135A</sup>) was obtained using the pBudCE4.1\_NS3<sup>WT</sup> template by employing the  
120 QuickChange PCR technique with appropriate primers (5' GGA ACT GCC GGA TCT CCA  
121 ATC CTA GAC AAG 3'; 5' AGA TCC GGC AGT TCC TGC TGG GTA ATC CAG 3') to  
122 change the serine residue at amino acid (aa) position 135 to alanine. The obtained plasmids  
123 were verified by DNA sequencing.

124

## 125 **Plasmid transfection**

126 293T cells were maintained as described above. Cells were seeded in 6- or 24-wells plates  
127 (TPP, Switzerland) and cultured for 24 h. When 60% confluency was reached, cells were  
128 transfected using polyethyleneimine (PEI; Sigma-Aldrich, Poland). For transfection in 6-wells  
129 plates, 4 µg plasmid DNA was mixed with 250 µl Opti-MEM medium (Thermo Scientific) and  
130 4 µg PEI. For transfection in 24-well plates, 1 µg/well plasmid DNA was mixed with 100 µl  
131 Opti-MEM medium with 1 µg PEI. After a 30 min incubation at room temperature, the mixture  
132 was added dropwise onto cells. Four hours later, the supernatant was discarded, fresh medium  
133 was added, and cells were further incubated at 37°C.

134 A549 cells were maintained as described above. Cells were seeded in 6-wells plates and  
135 cultured for 24 h. When 80% confluency was reached, cells were transfected with  
136 Lipofectamine 2000 (Thermo Scientific) according to the manufacturer's protocol. Briefly,

137 2.5 µg plasmid DNA was mixed with 300 µl Opti-MEM medium with 5 µl Lipofectamine 2000.  
138 After a 5 min incubation at room temperature, the mixture was added dropwise onto cells. Four  
139 hours later, the supernatant was discarded, fresh medium was added, and cells were further  
140 incubated at 37°C.

141 For expression of active and inactive virus protease, pBudCE4.1-NS3<sup>WT</sup> or pBudCE4.1-  
142 NS3<sup>S135A</sup> plasmids were employed, respectively. For eIF4G1 overexpression, cells were  
143 transfected with pcDNA3 HA eIF4GI plasmid or control green fluorescent protein (GFP)-  
144 expressing plasmid (pMAX-GFP plasmid, Lonza). pcDNA3 HA eIF4GI (1–1599) was a gift  
145 from Nahum Sonenberg (Addgene plasmid #45640; <http://n2t.net/addgene:45640>; RRID  
146 Addgene\_45640). The efficiency of expression was verified by western blotting.

147

#### 148 **siRNA transfection**

149 For small interfering RNA (siRNA) transfection, A549 cells were maintained as described  
150 above. Cells were seeded in 24-wells plates, and siRNA was transfected once the confluency  
151 reached 80% using RNAiMAX Lipofectamine (Thermo Scientific), according to the  
152 manufacturer's protocol. Next, 5 pmol eIF4G1 siRNA (Sigma-Aldrich; Cat. No EHU066831)  
153 or control scrambled RNA (Santa-Cruz Biotechnology; Cat. No sc-44237) was mixed in 125 µl  
154 Opti-MEM medium containing 3.5 µl transfection reagent. After a 5 min incubation at room  
155 temperature, the mixture was added to cells dropwise. The efficiency of eIF4G1 silencing was  
156 verified at 24–72 h post-transfection using western blotting.

157

#### 158 **Virus infection**

159 293T cells, A549 cells, and U251 cells were seeded in 6-wells plates and cultured at 37°C.  
160 When 90–100% confluency was reached, cells were inoculated with ZIKV at 2000 TCID<sub>50</sub>/ml  
161 for 293T cells or 400 TCID<sub>50</sub>/ml for U251 and A549 cells. Mock cultures were inoculated with



162 an identical volume of mock samples. All cultures were incubated for 2 h at 37°C under 5%  
163 CO<sub>2</sub> in DMEM medium supplemented with 2% FBS, 100 µg/ml streptomycin, and 100 IU/ml  
164 penicillin. After incubation, cells were washed twice with phosphate-buffered saline (PBS) and  
165 incubated as described above. At 3 days p.i., culture supernatants were collected, viral RNA  
166 was isolated, and the yield was quantified by reverse transcription quantitative PCR (RT-  
167 qPCR). Also, cells were collected for western blotting analysis.

168

### 169 **SUnSET-puromycin assay**

170 A549 and U251 cells were maintained as described above. Cells were seeded in 12-well  
171 plates and cultured for 48 h. When 80% confluency was reached, cells were inoculated with the  
172 Mexico ZIKV strain at 400 TCID<sub>50</sub>/ml (or an identical volume of the mock culture).  
173 Alternatively, 10 µg/ml or 5 µg/ml of the translation inhibitor cycloheximide (CHX; stock  
174 solution 100 mg/ml; Sigma-Aldrich) was added to A549 cells and U251 cells, respectively, or  
175 10 µM eIF4G1 inhibitor (4EGI-1; stock solution 10 mM; Biotechne)(32) was added. At 48 h  
176 p.i., cells were washed twice with PBS and incubated in unsupplemented DMEM for 2 h at  
177 37°C. The supernatant was discarded, fresh DMEM medium supplemented with 3% FBS, and  
178 1 µM puromycin (stock solution; Merck) was added, and cells were further incubated for 30  
179 min at 37°C. Subsequently, cells were collected for western blotting analysis.

180

### 181 **SDS-PAGE and western blotting**

182 Cells grown in 6-well, 12-well, or 24-well plates were lysed for 30 min on ice in 200 µl,  
183 100 µl, or 50 µl RIPA buffer (50 mM TRIS, 150 mM NaCl, 1% Nonidet P-40, 0.5% sodium  
184 deoxycholate, 0.1% SDS, pH 7.5), respectively. Subsequently, samples were centrifuged  
185 (10 min at 13,000 × g, 4°C), and the pelleted cell debris was discarded. The total protein  
186 concentration in each sample supernatant was quantified using the bicinchoninic acid (BCA)

187 method (Pierce BCA Protein Assay Kit; Thermo Scientific) according to the manufacturer's  
188 protocol. Supernatants were mixed 5:1 with denaturing buffer (202.5 mM TRIS pH 6.8, 10%  
189 SDS, 15%  $\beta$ -mercaptoethanol, 30% glycerol, 0.3% Bromophenol Blue) and boiled at 95°C for  
190 5 min.

191 For detection of proteins, lysates were loaded and separated on 12% polyacrylamide gels,  
192 and separated by SDS-PAGE over 2 h at 120 V. BlueStar Plus Prestained Protein Markers  
193 (NIPPON Genetics, Germany) were used for reference. Subsequently, gels were subjected to  
194 wet electrotransfer onto methanol-activated polyvinylidene difluoride (PVDF; GE Healthcare,  
195 Poland) membranes in 25 mM TRIS, 192 mM glycine, 20% methanol buffer for 1 h at 100 V.  
196 Following transfer, nonspecific binding sites were blocked with 5% skimmed milk (BioShop,  
197 Canada) in TRIS-buffered saline (20 mM TRIS, 0.5 M NaCl, pH 7.5) supplemented with 0.05%  
198 Tween 20 (TBS-T) by overnight incubation at 4°C. To detect NS3 protein, membranes were  
199 incubated with a rabbit anti-NS3 antibody (1:1000, GeneTex, USA) followed by a secondary  
200 goat anti-rabbit antibody (1:20000; Dako, Denmark) conjugated with horseradish peroxidase  
201 (HRP). To detect the eIF4G1 protein, membranes were incubated with a rabbit anti-eIF4G1  
202 antibody (1:1000; Thermo Scientific) followed by a secondary goat anti-rabbit antibody  
203 (1:20000; Dako) conjugated with HRP. For puromycin detection, membranes were incubated  
204 with mouse anti-puromycin antibody (1:10000; Merck) followed by a secondary rabbit anti-  
205 mouse antibody (1:20000; Dako) conjugated with HRP. To detect GAPDH protein, membranes  
206 were incubated with a rabbit anti-GAPDH antibody (1:5000; Cell Signaling) followed by a  
207 secondary goat anti-rabbit antibody (1:20000; Dako) conjugated with HRP. All antibodies were  
208 diluted in 1.5% skimmed milk in TBS-T. The signal was developed using Immobilon Western  
209 Chemiluminescent HRP Substrate (Millipore, Poland) and recorded with a ChemiDoc Imaging  
210 System (Bio-Rad, Poland).

211

## 212 **Isolation of nucleic acid and reverse transcription**

213 Viral RNA was isolated from 100 µl cell culture supernatant using a viral DNA/RNA  
214 Isolation Kit (A&A Biotechnology, Poland) according to the manufacturer's protocol. Reverse  
215 transcription was carried out using a High Capacity cDNA Reverse Transcription Kit (Thermo  
216 Scientific) according to the manufacturer's protocol. cDNA samples were prepared in 10 µl  
217 volumes using a High Capacity cDNA Reverse Transcription Kit (Thermo Scientific) according  
218 to the manufacturer's instructions. The reaction was carried out for 10 min at 25°C, 120 min at  
219 37°C, and 5 min at 85°C.

220

## 221 **Quantitative PCR (qPCR)**

222 Zika virus RNA yields were assessed using real-time PCR on a 7500 Fast Real-Time PCR  
223 instrument (Thermo Scientific, Poland). ZIKV cDNA was amplified in a reaction mixture  
224 containing 1× TaqMan Universal PCR Master Mix (RT-PCR mix; A&A) in the presence of  
225 FAM/TAMRA (6-carboxyfluorescein/6-carboxytetramethylrhodamine) probe (5' CGG CAT  
226 ACA GCA TCA GGT GCA TAG GAG 3'; 100 nM) and primers (5' TTG GTC ATG ATA  
227 CTG CTG ATT GC 3' and 5' CCT TCC ACA AAG TCC CTA TTG C 3'; 450 nM each). The  
228 reaction was carried out for 2 min at 50°C and 10 min at 92°C, followed by 40 cycles at 92°C  
229 for 15 s and 60°C for 1 min. DNA standards were subjected to qPCR along with the cDNA.  
230 Rox was used as a reference dye.

231

232

233 **RESULTS**

234 **Expression of Zika virus protease in eukaryotic cells**

235 In this study, we expressed and purified full-length NS2B-NS3 protein without linkers. The  
236 NS2B-NS3 protein and its inactive Ser135Ala variant were expressed from pBudCE4.1  
237 plasmids in 293T (left panel) and A549 (right panel) cells. Western blotting with anti-NS3  
238 antibody (full-length recombinant Zika virus NS3 protein was used as a positive control)  
239 detected NS2B-NS3<sup>WT</sup> and NS2B-NS3<sup>S135A</sup> in cell lysates prepared from cells collected at 48 h  
240 post-transfection. The band corresponding to NS3/NS2B was expected to migrate at ~82 kDa,  
241 but the active protease should undergo autocatalytic processing to yield the mature ~68 kDa  
242 NS3 protein (**Fig. 1A**). Processing should also result in the generation of the smaller 14 kDa  
243 NS2B (**Fig. 1B**). All fragments were observed as expected, confirming the activity of the  
244 protease, and protein expression was efficient in both cell lines.

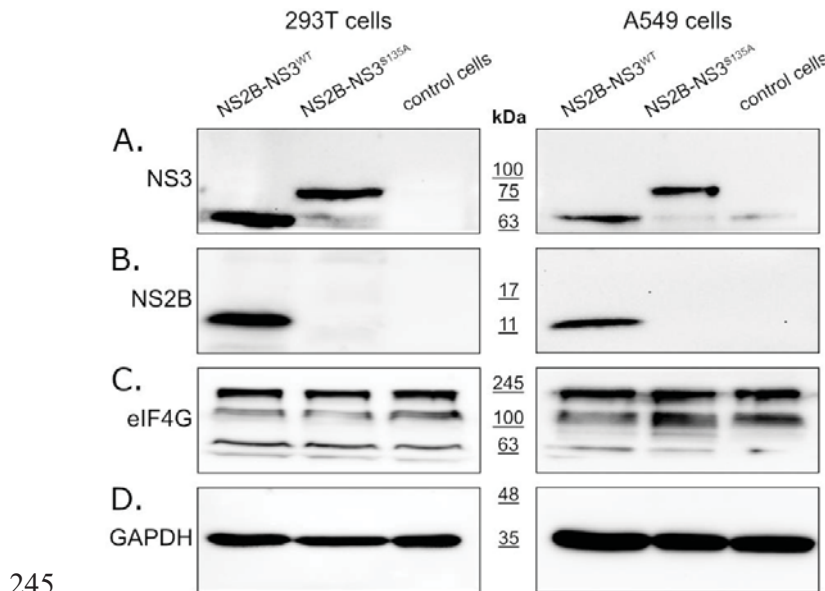

245

246 **Fig. 1 Expression of active and inactive NS2B-NS3 protease from Zika virus in eukaryotic cells does not**  
247 **affect eIF4G1 protein levels.** 293T (left panel) and A549 (right) cells expressing NS2B-NS3<sup>WT</sup> or NS2B-  
248 NS3<sup>S135A</sup> were assessed alongside control cells. Cells were harvested at 48 h after transfection, lysed,  
249 and virus lysates were analyzed by western blotting. Virus infection was confirmed by the presence of  
250 NS3 (**A**) and NS2B (**B**) proteins. Anti-eIF4G1 antibody was used to detect and compare changes in eIF4G1  
251 protein abundance in cells expressing active or inactive protease, relative to control cells (**C**). The GAPDH  
252 protein was used as a reference to ensure that identical amounts of proteins were present in each  
253 sample (**D**).

254

### 255 **NS3 protease does not affect eIF4G1 levels**

256 To verify whether the ZIKV NS3 protease has any effect on eIF4G1 levels, cells expressing  
257 either active or inactive protease were analyzed using western blotting, alongside control cells  
258 lacking the protease. The results (**Fig. 1C**) showed that eIF4G1 migrated at ~188 kDa, and  
259 isoforms with lower molecular masses were also visible. While we observed high variability in  
260 eIF4G1 content depending on the culture time, temperature, and general cell conditions, there  
261 were no differences in protein abundance in cells expressing active or inactive protease, or  
262 control cells (data not shown), and this was the case for both 293T and A549 cells.

263

### 264 **Zika virus infection does not result in altered eIF4G1 levels**

265 Since eIF4G1 levels were not affected by the expression of NS3 protease, we assessed  
266 whether the eIF4G1 protein is cleaved or degraded during virus infection using ZIKV-infected  
267 and mock-infected 293T and A549 cells. First, we confirmed virus replication in cells through  
268 NS3 and NS2B protein expression using western blotting (**Fig. 2A, B**). Levels of the eIF4G1  
269 protein were then assessed in virus-infected and mock-inoculated cells, but there were no  
270 differences in eIF4G1 protein abundance.

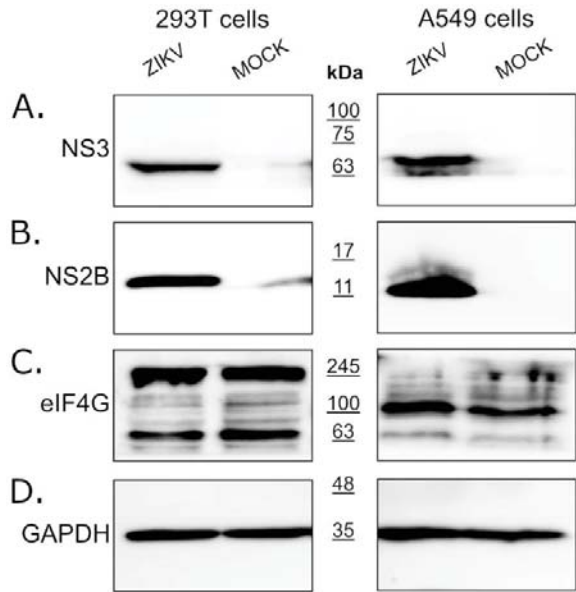

271

272 **Fig. 2 Expression of the eIF4G1 protein in ZIKV-infected and mock-infected cells.** 293T (left panel) and  
273 A549 (right panel) cells were infected with ZIKV, or inoculated with mock or virus lysates, and analyzed  
274 by western blotting. Virus infection was confirmed by the presence of NS3 (A) and NS2B (B) proteins.  
275 The eIF4G1 protein was detected using anti-eIF4G1 antibody (C). The GAPDH protein was used as a  
276 reference to ensure that identical amounts of proteins were present in each sample (D).  
277

## 278 **ZIKV does not hamper production of cellular proteins by altering levels of transcription** 279 **factors**

280 It was suggested that ZIKV NS3 cleaves eIF4G1 to redirect the cellular machinery toward  
281 viral protein production, which may be independent of cellular transcription factors(33). To test  
282 this hypothesis, the host protein synthesis efficiency was evaluated using surface sensing of  
283 translation (SUnSET) assays to measure protein synthesis in cultured cells (34). Puromycin can  
284 mimic the aminoacyl end of aminoacyl-tRNAs, and it is partially incorporated in synthesized  
285 proteins. The incorporation rate reflects the rate of mRNA translation. Puromycin incorporation  
286 was detected by western blotting using anti-puromycin antibodies. Two reference inhibitors  
287 were also tested: the protein synthesis inhibitor cycloheximide (CHX) and the eIF4G1-specific  
288 inhibitor 4EGI1 (**Fig. 3A**). In samples treated with either CHX or 4EGI1, the synthesis of  
289 proteins was significantly hampered, but protein synthesis in ZIKV-infected cells was not  
290 altered. The cytotoxicity of the inhibitors was also evaluated (**Fig. 3B**).

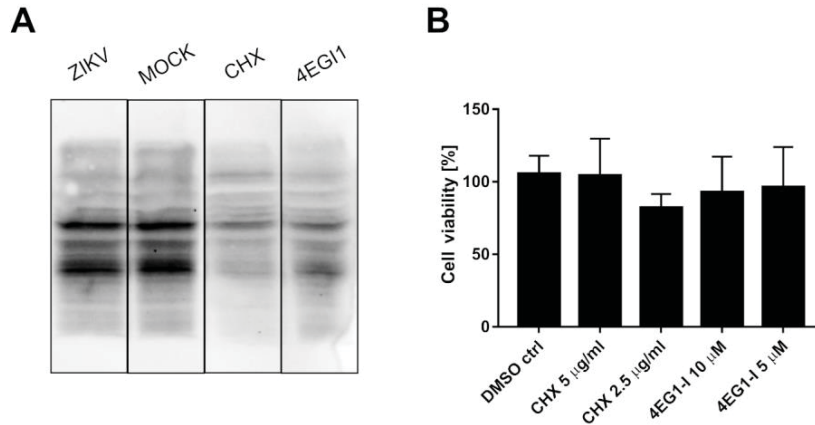

291

292 **Fig. 3 ZIKV infection does not inhibit the translation of host proteins.** SUnSet assays were performed on  
293 ZIKV- and mock-infected A549 cells, and cells treated with cycloheximide or 4EGI1 inhibitors. The  
294 presence of puromycin protein was detected using anti-puromycin antibody (A). Cell viability was  
295 evaluated relative to control cells treated with DMSO alone. The assay was performed in triplicate, and  
296 average values with standard errors are presented (B).  
297

### 298 **Overexpression of eIF4G1 does not limit ZIKV replication**

299 To verify whether eIF4G1 expression negatively regulates replication of ZIKV, 293T cells  
300 were transfected with a plasmid encoding eIF4G1 (or GFP as a control). Protein levels were  
301 verified using western blotting (Fig. 4A), and ZIKV replication was evaluated in non-  
302 transfected cells, GFP-expressing cells, and eIF4G-expressing cells. Different strains of Zika  
303 virus were used to ensure that any effect is not limited to a single lineage. Cells were infected,  
304 and at a single timepoint cell culture supernatants were collected for RNA isolation and  
305 subsequent RT-qPCR assessment of the virus yield. Although virus yields varied depending on  
306 the virus strain, no inhibition of virus replication was observed for any of the tested strains.  
307 These results show that NS3-mediated loss of function of the eIF4G1 protein was not beneficial  
308 for virus replication (Fig. 4B).

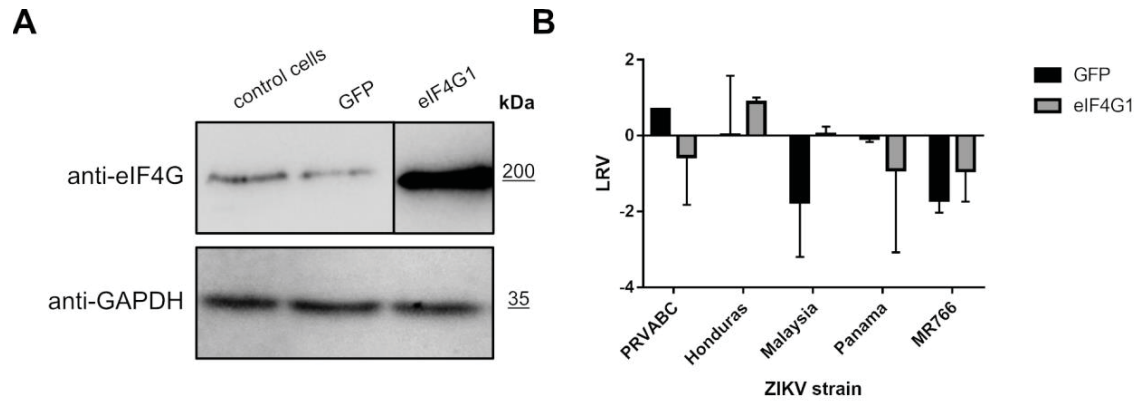

309

310 **Fig. 4 ZIKV replication in eIF4G1-overexpressing cells.** Western blotting analysis (anti-eIF4G1 antibodies)  
311 was performed on 293T cells transfected with plasmid encoding eIF4G1 or GFP. The GAPDH protein was  
312 used as a reference to ensure that identical amounts of proteins were present in each sample (**A**). ZIKV  
313 virus replication in 293T cells transfected with plasmid encoding eIF4G1 or GFP. The virus yield was  
314 assessed by RT-qPCR. The y-axis represents the log reduction value (LRV) in virus yield in treated  
315 samples, and the x-axis corresponds to different ZIKV strains. The assay was performed in triplicate, and  
316 average values with standard errors are presented (**B**).  
317

### 318 **eIF4G supports replication of ZIKV**

319 To further investigate the role of eIF4G1, we silenced its expression in 293T cells and  
320 probed ZIKV replication in these cells. Briefly, cultures were transfected with eIF4G1 siRNA  
321 or with scrambled siRNA. Silencing was confirmed by western blotting using antibodies  
322 specific to eIF4G1 (**Fig. 5A**). Cells were infected with ZIKV and incubated for 3 days at 37°C,  
323 after which culture supernatants were collected, RNA was isolated and reverse transcribed, and  
324 virus replication was evaluated by qPCR. Again, we did not observe an increase in virus  
325 production; on the contrary, for some strains, silencing led to inhibition of virus replication  
326 relative to control cells or cells transfected with scrambled siRNA (**Fig. 5B**).



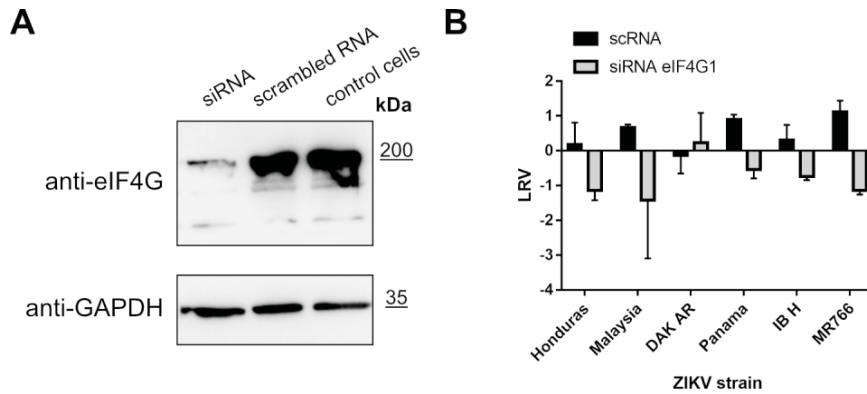

327

328 **Fig. 5 ZIKV replication in cells lacking eIF4G1.** A549 cells were transfected with eIF4G1 siRNA or  
329 scrambled siRNA. Non-transfected controls were included. The GAPDH protein was used as a reference  
330 to ensure that identical amounts of proteins were present in each sample (A). ZIKV virus replication in  
331 A549 cells transfected with different siRNAs. The virus yield was assessed by RT-qPCR. The y-axis  
332 represents the log reduction value (LRV) in virus yield in treated samples, and the x-axis corresponds to  
333 different ZIKV strains. The assay was performed in triplicate, and average values with standard errors  
334 are presented (B).

335

## 336 Discussion

337 This study aimed to verify the role of the ZIKV NS3 protein in the remodeling of host cells.  
338 NS3 protease is essential for virus replication because it is required for viral protein maturation  
339 (35-37). However, viral proteases are generally considered to be highly specific enzymes that  
340 co-evolved with the host, and they typically target specific cellular pathways to support viral  
341 replication in the host cell, or to block recognition of the virus by the host immune system (38,  
342 39). In the case of ZIKV, some protease targets have been identified, and these are listed in

343 **Table 1.**

344

345 **Table 1.** Reported NS3 protease targets in the cell.

|   | PROTEIN                                                   | FUNCTION                          | PROTEASE EXPRESSION                                                                                                                                         | CELLULAR MODEL                                                                                                | IDENTIFICATION                                                                         | REFERENCES |
|---|-----------------------------------------------------------|-----------------------------------|-------------------------------------------------------------------------------------------------------------------------------------------------------------|---------------------------------------------------------------------------------------------------------------|----------------------------------------------------------------------------------------|------------|
| 1 | autophagy-related protein 16-1 (ATG16L1)                  | Autophagy                         | expression in the prokaryotic system; construct based on 48-100 aa residues of NS2B and 1-178 aa of NS3 (protease domain)                                   | protease substrate verification in the cellular lysate of 293T and A549 cells treated with purified protease; | mass spectrometry; Western blot analysis                                               | (33)       |
| 2 | eukaryotic translation initiation factor 4 gamma (eIF4G1) | Translation process               | expression in prokaryotic system; construct based on 48-100 aa residues of NS2B and 1-178 aa of NS3 (protease domain)                                       | protease substrate verification in cellular lysate of 293T and A549 cells treated with purified protease;     | mass spectrometry; Western blot analysis                                               | (33)       |
| 3 | FAM134B                                                   | Reticulofagy                      | expression in eukaryotic cells; the NS2B-NS3 protein coding region was amplified from cDNA produced from HBMEC infected with ZIKV MR766; cells transfection | HBMEC, U2OS, 293T and HeLa cells                                                                              | Western blots and the fluorescence microscopy analysis                                 | (40)       |
| 4 | Septin-2                                                  | Cytokinesis                       | expression in eukaryotic cells, cells transfection, and transduction with lentiviral vectors;                                                               | HeLa and 293T cells and human neural progenitor cells                                                         | mass spectrometry; Western blots and fluorescence microscopy analysis, pull-down assay | (41)       |
| 5 | disulfide-isomerase A3 (PDIA3)                            | ER stress response                | Expression in eukaryotic cells, cells transfection; construct based on 48-94 aa residues of NS2B and 1-188 aa of NS3 (protease domain)                      | 293T and A549 cells                                                                                           | mass spectrometry and Western blot analysis                                            | (42)       |
| 6 | aldolase A (ALDOA)                                        | glycolysis                        | Expression in eukaryotic cells, cells transfection; construct based on 48-94 aa residues of NS2B and 1-188 aa of NS3 (protease domain)                      | 293T and A549 cells                                                                                           | mass spectrometry and Western blot analysis                                            | (42)       |
| 7 | Nup98, Nup153 and TPR                                     | Formation of nuclear pore complex | Expression in eukaryotic cells, cells transfection                                                                                                          | Huh-7 cells                                                                                                   | Western blots and the fluorescence microscopy analysis                                 | (43)       |

346

347

348 In the present work, we reviewed the published data and verified these potential protease  
349 targets experimentally by measuring changes in the levels of potential cellular targets in the  
350 presence of active or inactive protease. Since in some cases the localization or specificity of the  
351 protease may differ in the absence of other viral proteins, we also measured the levels of  
352 potential NS3 targets in ZIKV-infected cells.

353 We employed eIF4G1 as a model protease substrate because we believe that processing of  
354 this protein has straightforward consequences for both host cells and virus. The eIF4G protein  
355 is involved in the translation process by serving as a eukaryotic translation initiation factor.  
356 Together with eIF4A and eIF4E, eIF4G forms the EIF4F multi-subunit protein complex, which  
357 recognizes the mRNA cap and facilitates the recruitment of mRNA to the ribosome. eIF4G  
358 serves mainly as a linker that forms a scaffold for the complex (44). Interestingly, some viruses  
359 are reported to target this protein, and thereby rewire the cellular machinery and switch off  
360 cellular protein production. For example, coxsackievirus B3 virus-encoded protease cleaves  
361 eIF4G1, but the resulting suppression of cellular translation does not affect viral replication,  
362 since picornaviruses utilize the IRES rather than cap-dependent translation initiation (25-27).  
363 Consequently, the complete protein production machinery serves viral replication. Similarly,  
364 for some flaviviruses, it was postulated that the 5'-untranslated region (5'-UTR) may act as an  
365 IRES, and NS3 protease encoded in the flaviviral genome may target cellular translation  
366 initiation factors (45).

367 Herein, we first tested whether overexpression of NS2B/NS3 had any effect on levels of  
368 the eIF4G1 protein, as reported previously by Hill *et al.* (2018). Notably, the authors of this  
369 work performed their analysis using ZIKV protease expressed in a prokaryotic system, which  
370 was purified and mixed with cellular lysates from 293T and A549 cells (33). In our current  
371 work, we expressed part of the ZIKV genome encompassing the NS2B and NS3 proteins. Our  
372 approach allowed us to anchor the NS3 protease in the ER membrane *via* the NS2B cofactor.

373 Furthermore, using this approach, we were able to monitor whether the protease was active in  
374 every experiment because it was autocatalytically (in trans and cis) processing its natural  
375 substrate (the NS2B/NS3 junction). The catalytically inactive mutant was used as a negative  
376 control. Protein content analysis did not reveal any significant decrease in eIF4G1 protein  
377 levels. However, the experimental setup used in the present study may not be entirely  
378 appropriate, since it may not accurately recapitulate protease activity and localization during  
379 natural viral infection. To ensure that the observed effect was not an artifact, cells were infected  
380 with ZIKV, and eIF4G1 levels were measured. Because it remains disputable whether a specific  
381 decrease in the level of a particular protein is reflected by changes in signal transduction, we  
382 tested the effect of ZIKV infection on the production of cellular proteins using the puromycin  
383 assay, with appropriate controls (32)(46). We did not observe any changes in host gene  
384 translation, proving that the effect on eIF4G1 cleavage is not likely to alter the physiology of  
385 the cell. However, modulation may occur locally at the replication site, and while it would  
386 improve viral replication, the effect on the whole cell may be too subtle to be detected. For this  
387 reason, the effect of eIF4G1 on ZIKV replication was tested by gene silencing and gene  
388 overexpression experiments, but the role of the eIF4G1 protein in viral replication remained  
389 elusive.

390 As listed in **Table 1**, several proteins have been reported as targets for the ZIKV NS3  
391 protease. Intrigued by the results obtained for the eIF4G1 protein, we explored whether  
392 autophagy-related protein 16-1 (ATG16L1), c-Jun amino-terminal kinase-interacting protein 4  
393 (JIP4), mitogen-activated protein kinase kinase kinase 7 (TAK1 or MAP3K7), disulfide-  
394 isomerase A3 (PDIA3), heterogeneous nuclear ribonucleoprotein A2/B1 (hnRNP A2/B1),  
395 aldolase A (ALDOA) (42), ER-localized reticulophagy receptor FAM134B (40), and septin-2  
396 protein (41) may serve as targets for the NS3 protease. To our surprise, we could not confirm  
397 these previous observations, and we considered why this might be the case. First, in these

398 previous studies, different expression systems and constructs were employed. In some cases,  
399 part of the NS2B cofactor was covalently linked to NS3 by a flexible linker. This is relevant,  
400 as it has been shown by others that the linker itself may alter the dynamics of the protein and,  
401 consequently, the substrate specificity of the protease. Second, the soluble version of the  
402 protease is not anchored at the membrane, which may also alter the substrate specificity. Third,  
403 the localization of the protease in the ER may limit the number of possible targets, and even  
404 proteins that may serve as NS3 substrates in biochemical assays may not be cleaved due to the  
405 differential spatial distribution. Finally, although mass spectrometry is sensitive enough to  
406 detect even minor changes in protein content, it could in some cases deliver results which are  
407 not relevant for the homeostasis of the intracellular environment. Therefore proteome changes  
408 detected by MS should be confirmed by other methods, and their biological relevance should  
409 be explored, using other approaches.

410 In conclusion, our study shows that the biological role of the ZIKV NS3 protease may be  
411 limited. This may be due to the relatively recent transmission of the virus on a large scale to the  
412 human population. It would therefore be interesting to analyze virus evolution in humans in the  
413 future, especially changes in the localization and/or substrate specificity of NS3 protease.

414

#### 415 **Funding**

416 This work was supported by the National Science Centre, Poland, in the form of Grant No.  
417 2016/21/B/NZ6/01307 to K.P and P.S. The funders had no role in study design, data collection  
418 and analysis, decision to publish, or preparation of the manuscript.

419

#### 420 **References**

421

422

- 423 1. Dick, G. W., and Haddow, A. J. (1952) Uganda S virus; a hitherto unrecorded virus  
424 isolated from mosquitoes in Uganda. I. Isolation and pathogenicity. *Trans R Soc Trop Med*  
425 *Hyg* 46, 600-618
- 426 2. Duffy, M. R., Chen, T. H., Hancock, W. T., Powers, A. M., Kool, J. L., Lanciotti, R. S.,  
427 Pretrick, M., Marfel, M., Holzbauer, S., Dubray, C., Guillaumot, L., Griggs, A., Bel, M.,  
428 Lambert, A. J., Laven, J., Kosoy, O., Panella, A., Biggerstaff, B. J., Fischer, M., and Hayes, E.  
429 B. (2009) Zika virus outbreak on Yap Island, Federated States of Micronesia. *N Engl J Med*  
430 360, 2536-2543
- 431 3. Musso, D., Ko, A. I., and Baud, D. (2019) Zika Virus Infection - After the Pandemic. *N*  
432 *Engl J Med* 381, 1444-1457
- 433 4. Campos, G. S., Bandeira, A. C., and Sardi, S. I. (2015) Zika Virus Outbreak, Bahia,  
434 Brazil. *Emerg Infect Dis* 21, 1885-1886
- 435 5. Uncini, A., Shahrizaila, N., and Kuwabara, S. (2017) Zika virus infection and Guillain-  
436 Barré syndrome: a review focused on clinical and electrophysiological subtypes. *J Neurol*  
437 *Neurosurg Psychiatry* 88, 266-271
- 438 6. Barbi, L., Coelho, A. V. C., Alencar, L. C. A., and Crovella, S. (2018) Prevalence of  
439 Guillain-Barré syndrome among Zika virus infected cases: a systematic review and meta-  
440 analysis. *Braz J Infect Dis* 22, 137-141
- 441 7. Nascimento, O. J. M., and da Silva, I. R. F. (2017) Guillain-Barré syndrome and Zika  
442 virus outbreaks. *Curr Opin Neurol* 30, 500-507
- 443 8. Vissoci, J. R. N., Rocha, T. A. H., Silva, N. C. D., de Sousa Queiroz, R. C., Thomaz, E.  
444 B. A. F., Amaral, P. V. M., Lein, A., Branco, M. D. R. F., Aquino, J., Rodrigues, Z. M. R., da  
445 Silva, A. A. M., and Staton, C. (2018) Zika virus infection and microcephaly: Evidence  
446 regarding geospatial associations. *PLoS Negl Trop Dis* 12, e0006392
- 447 9. Barreto, M. L., Barral-Netto, M., Stabeli, R., Almeida-Filho, N., Vasconcelos, P. F. C.,  
448 Teixeira, M., Buss, P., and Gadelha, P. E. (2016) Zika virus and microcephaly in Brazil: a  
449 scientific agenda. *Lancet* 387, 919-921
- 450 10. Mlakar, J., Korva, M., Tul, N., Popović, M., Poljšak-Prijatelj, M., Mraz, J., Kolenc, M.,  
451 Resman Rus, K., Vesnaver Vipotnik, T., Fabjan Vodusek, V., Vizjak, A., Pižem, J., Petrovec,  
452 M., and Avšič Županc, T. (2016) Zika Virus Associated with Microcephaly. *N Engl J Med* 374,  
453 951-958
- 454 11. Fields, B. N., Knipe, D. M., and Howley, P. M. (2013) *Fields virology*, 6th Ed., Wolters  
455 Kluwer Health/Lippincott Williams & Wilkins, Philadelphia
- 456 12. Hoffmann, H. H., Schneider, W. M., Blomen, V. A., Scull, M. A., Hovnanian, A.,  
457 Brummelkamp, T. R., and Rice, C. M. (2017) Diverse Viruses Require the Calcium Transporter  
458 SPCA1 for Maturation and Spread. *Cell Host Microbe* 22, 460-470 e465
- 459 13. Bessaud, M., Pastorino, B. A., Peyrefitte, C. N., Rolland, D., Grandadam, M., and  
460 Tolou, H. J. (2006) Functional characterization of the NS2B/NS3 protease complex from seven  
461 viruses belonging to different groups inside the genus Flavivirus. *Virus Res* 120, 79-90
- 462 14. Chambers, T. J., Grakoui, A., and Rice, C. M. (1991) Processing of the yellow fever  
463 virus nonstructural polyprotein: a catalytically active NS3 proteinase domain and NS2B are  
464 required for cleavages at dibasic sites. *J Virol* 65, 6042-6050
- 465 15. Falgout, B., Miller, R. H., and Lai, C. J. (1993) Deletion analysis of dengue virus type  
466 4 nonstructural protein NS2B: identification of a domain required for NS2B-NS3 protease  
467 activity. *J Virol* 67, 2034-2042
- 468 16. Lescar, J., Luo, D., Xu, T., Sampath, A., Lim, S. P., Canard, B., and Vasudevan, S. G.  
469 (2008) Towards the design of antiviral inhibitors against flaviviruses: the case for the  
470 multifunctional NS3 protein from Dengue virus as a target. *Antiviral Res* 80, 94-101
- 471 17. Leung, D., Schroder, K., White, H., Fang, N. X., Stoermer, M. J., Abbenante, G., Martin,  
472 J. L., Young, P. R., and Fairlie, D. P. (2001) Activity of recombinant dengue 2 virus NS3

- 473 protease in the presence of a truncated NS2B co-factor, small peptide substrates, and inhibitors.  
474 *J Biol Chem* 276, 45762-45771
- 475 18. Aguilera-Pesantes, D., and Méndez, M. A. (2017) Structure and sequence based  
476 functional annotation of Zika virus NS2b protein: Computational insights. *Biochem Biophys*  
477 *Res Commun* 492, 659-667
- 478 19. Erbel, P., Schiering, N., D'Arcy, A., Renatus, M., Kroemer, M., Lim, S. P., Yin, Z.,  
479 Keller, T. H., Vasudevan, S. G., and Hommel, U. (2006) Structural basis for the activation of  
480 flaviviral NS3 proteases from dengue and West Nile virus. *Nat Struct Mol Biol* 13, 372-373
- 481 20. Xing, H., Xu, S., Jia, F., Yang, Y., Xu, C., Qin, C., and Shi, L. (2020) Zika NS2B is a  
482 crucial factor recruiting NS3 to the ER and activating its protease activity. *Virus Res* 275,  
483 197793
- 484 21. Chatel-Chaix, L., Germain, M. A., Götte, M., and Lamarre, D. (2012) Direct-acting and  
485 host-targeting HCV inhibitors: current and future directions. *Curr Opin Virol* 2, 588-598
- 486 22. Chatel-Chaix, L., Baril, M., and Lamarre, D. (2010) Hepatitis C Virus NS3/4A Protease  
487 Inhibitors: A Light at the End of the Tunnel. *Viruses* 2, 1752-1765
- 488 23. McCauley, J. A., and Rudd, M. T. (2016) Hepatitis C virus NS3/4a protease inhibitors.  
489 *Curr Opin Pharmacol* 30, 84-92
- 490 24. Croft, S. N., Walker, E. J., and Ghildyal, R. (2018) Human Rhinovirus 3C protease  
491 cleaves RIPK1, concurrent with caspase 8 activation. *Sci Rep* 8, 1569
- 492 25. Avanzino, B. C., Fuchs, G., and Fraser, C. S. (2017) Cellular cap-binding protein,  
493 eIF4E, promotes picornavirus genome restructuring and translation. *Proc Natl Acad Sci U S A*  
494 114, 9611-9616
- 495 26. Chase, A. J., and Semler, B. L. (2012) Viral subversion of host functions for  
496 picornavirus translation and RNA replication. *Future Virol* 7, 179-191
- 497 27. Glaser, W., and Skern, T. (2000) Extremely efficient cleavage of eIF4G by picornaviral  
498 proteinases L and 2A in vitro. *FEBS Lett* 480, 151-155
- 499 28. Li, K., Foy, E., Ferreon, J. C., Nakamura, M., Ferreon, A. C., Ikeda, M., Ray, S. C.,  
500 Gale, M., and Lemon, S. M. (2005) Immune evasion by hepatitis C virus NS3/4A protease-  
501 mediated cleavage of the Toll-like receptor 3 adaptor protein TRIF. *Proc Natl Acad Sci U S A*  
502 102, 2992-2997
- 503 29. Meylan, E., Curran, J., Hofmann, K., Moradpour, D., Binder, M., Bartenschlager, R.,  
504 and Tschopp, J. (2005) Cardif is an adaptor protein in the RIG-I antiviral pathway and is  
505 targeted by hepatitis C virus. *Nature* 437, 1167-1172
- 506 30. Anggakusuma, Brown, R. J. P., Banda, D. H., Todt, D., Vieyres, G., Steinmann, E., and  
507 Pietschmann, T. (2016) Hepacivirus NS3/4A Proteases Interfere with MAVS Signaling in both  
508 Their Cognate Animal Hosts and Humans: Implications for Zoonotic Transmission. *J Virol* 90,  
509 10670-10681
- 510 31. REED, L. J., and MUENCH, H. (1938) A SIMPLE METHOD OF ESTIMATING  
511 FIFTY PER CENT ENDPOINTS. *American Journal of Epidemiology* 27, 493-497
- 512 32. Moerke, N. J., Aktas, H., Chen, H., Cantel, S., Reibarkh, M. Y., Fahmy, A., Gross, J.  
513 D., Degterev, A., Yuan, J., Chorev, M., Halperin, J. A., and Wagner, G. (2007) Small-molecule  
514 inhibition of the interaction between the translation initiation factors eIF4E and eIF4G. *Cell*  
515 128, 257-267
- 516 33. Hill, M. E., Kumar, A., Wells, J. A., Hobman, T. C., Julien, O., and Hardy, J. A. (2018)  
517 The Unique Cofactor Region of Zika Virus NS2B-NS3 Protease Facilitates Cleavage of Key  
518 Host Proteins. *ACS Chem Biol* 13, 2398-2405
- 519 34. Schmidt, E. K., Clavarino, G., Ceppi, M., and Pierre, P. (2009) SUnSET, a  
520 nonradioactive method to monitor protein synthesis. *Nat Methods* 6, 275-277

- 521 35. Falgout, B., Pethel, M., Zhang, Y. M., and Lai, C. J. (1991) Both nonstructural proteins  
522 NS2B and NS3 are required for the proteolytic processing of dengue virus nonstructural  
523 proteins. *J Virol* 65, 2467-2475
- 524 36. Liu, W. J., Sedlak, P. L., Kondratieva, N., and Khromykh, A. A. (2002)  
525 Complementation analysis of the flavivirus Kunjin NS3 and NS5 proteins defines the minimal  
526 regions essential for formation of a replication complex and shows a requirement of NS3 in cis  
527 for virus assembly. *J Virol* 76, 10766-10775
- 528 37. Gebhard, L. G., Iglesias, N. G., Byk, L. A., Filomatori, C. V., De Maio, F. A., and  
529 Gamarnik, A. V. (2016) A Proline-Rich N-Terminal Region of the Dengue Virus NS3 Is Crucial  
530 for Infectious Particle Production. *J Virol* 90, 5451-5461
- 531 38. Castelló, A., Franco, D., Moral-López, P., Berlanga, J. J., Alvarez, E., Wimmer, E., and  
532 Carrasco, L. (2009) HIV-1 protease inhibits Cap- and poly(A)-dependent translation upon  
533 eIF4GI and PABP cleavage. *PLoS One* 4, e7997
- 534 39. Alvarez, E., Menéndez-Arias, L., and Carrasco, L. (2003) The eukaryotic translation  
535 initiation factor 4GI is cleaved by different retroviral proteases. *J Virol* 77, 12392-12400
- 536 40. Lennemann, N. J., and Coyne, C. B. (2017) Dengue and Zika viruses subvert  
537 reticulophagy by NS2B3-mediated cleavage of FAM134B. *Autophagy* 13, 322-332
- 538 41. Li, H., Saucedo-Cuevas, L., Yuan, L., Ross, D., Johansen, A., Sands, D., Stanley, V.,  
539 Guemez-Gamboa, A., Gregor, A., Evans, T., Chen, S., Tan, L., Molina, H., Sheets, N.,  
540 Shiryayev, S. A., Terskikh, A. V., Gladfelter, A. S., Shresta, S., Xu, Z., and Gleeson, J. G. (2019)  
541 Zika Virus Protease Cleavage of Host Protein Septin-2 Mediates Mitotic Defects in Neural  
542 Progenitors. *Neuron* 101, 1089-1098.e1084
- 543 42. Tangsongcharoen, C., Roytrakul, S., and Smith, D. R. (2019) Analysis of cellular  
544 proteome changes in response to ZIKV NS2B-NS3 protease expression. *Biochim Biophys Acta*  
545 *Proteins Proteom* 1867, 89-97
- 546 43. De Jesús-González, L. A., Cervantes-Salazar, M., Reyes-Ruiz, J. M., Osuna-Ramos, J.  
547 F., Farfán-Morales, C. N., Palacios-Rápalo, S. N., Pérez-Olais, J. H., Cordero-Rivera, C. D.,  
548 Hurtado-Monzón, A. M., Ruíz-Jiménez, F., Gutiérrez-Escolano, A. L., and Del Ángel, R. M.  
549 (2020) The Nuclear Pore Complex: A Target for NS3 Protease of Dengue and Zika Viruses.  
550 *Viruses* 12
- 551 44. Jackson, R. J., Hellen, C. U., and Pestova, T. V. (2010) The mechanism of eukaryotic  
552 translation initiation and principles of its regulation. *Nat Rev Mol Cell Biol* 11, 113-127
- 553 45. Song, Y., Mugavero, J., Stauff, C. B., and Wimmer, E. (2019) Dengue and Zika Virus  
554 5' Untranslated Regions Harbor Internal Ribosomal Entry Site Functions. *MBio* 10
- 555 46. Schneider-Poetsch, T., Ju, J., Eyler, D. E., Dang, Y., Bhat, S., Merrick, W. C., Green,  
556 R., Shen, B., and Liu, J. O. (2010) Inhibition of eukaryotic translation elongation by  
557 cycloheximide and lactimidomycin. *Nat Chem Biol* 6, 209-217
- 558
